# Supplementary material for: Development and Clinical Evaluation of a Web-Based Upper Limb Home Rehabilitation System Using a Smartwatch and Machine Learning Model for Chronic Stroke Survivors: Prospective Comparative Study
Source: PubMed Central journal article supplement (PMC7380903; doi:10.2196/17216), 2020-07-09
Supplement: mhealth_v8i7e17216_app3.pdf [file mhealth_v8i7e17216_app3.pdf]

Multimedia Appendix 3. Accuracy calculation by cross-validation test

Table 1-1. Personal data (A)

|                   | TP   | FN | FP | TN   | Accuracy                        |
|-------------------|------|----|----|------|---------------------------------|
| No exercise       | 399  | 0  | 0  | 825  | 100<br>(1224/1224) <sup>a</sup> |
| Bilateral flexion | 294  | 5  | 12 | 809  | 98.5<br>(1103/1120)             |
| Wall push         | 255  | 3  | 7  | 759  | 99.0<br>(1014/1024)             |
| Active scapula    | 274  | 35 | 43 | 756  | 93.0<br>(1030/1108)             |
| Towel slide       | 293  | 0  | 0  | 832  | 100<br>(1125/1125)              |
| Total             | 1515 | 43 | 62 | 3981 | 98.1<br>(5496/5601)             |

Appendix Table 1-2. Personal data (G)

|                   | TP   | FN  | FP  | TN   | Accuracy            |
|-------------------|------|-----|-----|------|---------------------|
| No exercise       | 378  | 21  | 31  | 794  | 95.8<br>(1172/1224) |
| Bilateral flexion | 280  | 19  | 6   | 815  | 97.8<br>(1095/1120) |
| Wall push         | 221  | 37  | 28  | 738  | 93.7<br>(959/1024)  |
| Active scapula    | 261  | 11  | 16  | 820  | 97.6<br>(1081/1108) |
| Towel slide       | 272  | 21  | 30  | 802  | 95.5<br>(1074/1125) |
| Total             | 1412 | 109 | 111 | 3969 | 96.0<br>(5381/5601) |

Appendix Table 1-3. Personal data (A+G)

|                   | TP  | TN | FP | TN  | Accuracy            |
|-------------------|-----|----|----|-----|---------------------|
| No exercise       | 399 | 0  | 0  | 825 | 100<br>(1224/1224)  |
| Bilateral flexion | 290 | 9  | 2  | 819 | 99.0<br>(1109/1120) |
| Wall push         | 258 | 0  | 0  | 766 | 100<br>(1024/1024)  |
| Active scapula    | 272 | 0  | 0  | 836 | 100<br>(1108/1108)  |

|             |      |   |   |      |                     |
|-------------|------|---|---|------|---------------------|
| Towel slide | 293  | 0 | 0 | 832  | 100<br>(1125/1125)  |
| Total       | 1512 | 9 | 2 | 4078 | 99.9<br>(5590/5601) |

Appendix Table 2-1. Total data (A)

|                   | TP   | TN  | FP  | TN   | Accuracy            |
|-------------------|------|-----|-----|------|---------------------|
| No exercise       | 388  | 11  | 21  | 804  | 97.4<br>(1192/1224) |
| Bilateral flexion | 274  | 25  | 19  | 802  | 96.1<br>(1076/1120) |
| Wall push         | 224  | 34  | 30  | 736  | 93.8<br>(960/1024)  |
| Active scapula    | 228  | 44  | 42  | 794  | 92.2<br>(1022/1108) |
| Towel slide       | 258  | 35  | 30  | 802  | 94.2<br>(1060/1125) |
| Total             | 1372 | 149 | 142 | 3938 | 94.8<br>(5310/5601) |

Appendix Table 2-2. Total data (G)

|                   | TP   | TN  | FP  | TN   | Accuracy            |
|-------------------|------|-----|-----|------|---------------------|
| No exercise       | 389  | 10  | 17  | 808  | 97.8<br>(1197/1224) |
| Bilateral flexion | 287  | 12  | 9   | 812  | 98.1<br>(1099/1120) |
| Wall push         | 200  | 58  | 80  | 686  | 86.5<br>(886/1024)  |
| Active scapula    | 198  | 74  | 70  | 766  | 87.0<br>(964/1108)  |
| Towel slide       | 228  | 65  | 62  | 770  | 88.7<br>(998/1125)  |
| Total             | 1302 | 219 | 238 | 3842 | 91.8<br>(5144/5601) |

Appendix Table 2-3. Total data (A+G)

|                   | TP  | TN | FP | TN  | Accuracy            |
|-------------------|-----|----|----|-----|---------------------|
| No exercise       | 399 | 0  | 0  | 825 | 100<br>(1224/1224)  |
| Bilateral flexion | 282 | 17 | 14 | 807 | 97.2<br>(1089/1120) |
| Wall push         | 226 | 32 | 38 | 728 | 93.2<br>(954/1024)  |

|                |      |     |     |      |                     |
|----------------|------|-----|-----|------|---------------------|
| Active scapula | 233  | 39  | 39  | 797  | 93.0<br>(1030/1108) |
| Towel slide    | 268  | 25  | 26  | 806  | 95.5<br>(1074/1125) |
| Total          | 1408 | 113 | 117 | 3963 | 95.8<br>(5371/5601) |

---
